# Supplementary material for: Type-II lateral SnSe/GeTe heterostructures for solar photovoltaic applications with high efficiency
Source: Royal Society of Chemistry journal article supplement (doi:10.1039/d1na00209k), 2021-01-01
Supplement: d1na00209k1.pdf [file d1na00209k1.pdf]

## Supporting Information

### **Type-II Lateral SnSe/GeTe Heterostructure for Solar Photovoltaic Applications with High Efficiency**

*Qianyong Zhuang, Jin Li\*, Chaoyu He, Tao Ouyang, Chunxiao Zhang, Chao Tang\*,  
Jianxin Zhong*

<sup>1</sup> Hunan Key Laboratory of Micro-Nano Energy Materials and Devices, Xiangtan  
University, Hunan 411105, People's Republic of China

<sup>2</sup> School of Physics and Optoelectronics, Xiangtan University, Hunan 411105,  
People's Republic of China

E-mail: lijin@xtu.edu.cn; tang\_chao@xtu.edu.cn

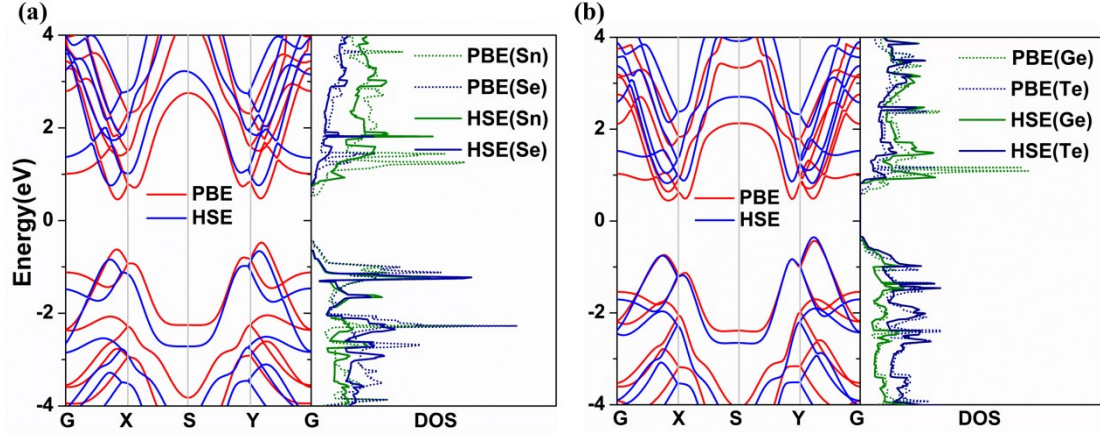

**Fig. S1** The band structure and projected density of states for monolayer (a) SnSe (b) GeTe.

**Table S1** Equilibrium 2D Lattice Parameters and bandgaps calculated by PBE and HSE06 methods.

|      | This work |      |                  |                  | Ref.[9] |      |                  |                  |
|------|-----------|------|------------------|------------------|---------|------|------------------|------------------|
|      | a(Å)      | b(Å) | $E_{g-PBE}$ (eV) | $E_{g-HSE}$ (eV) | a(Å)    | b(Å) | $E_{g-PBE}$ (eV) | $E_{g-HSE}$ (eV) |
| SnSe | 4.29      | 4.39 | 0.93             | 1.41             | 4.28    | 4.43 | 1.00             | 1.44             |
| GeTe | 4.24      | 4.37 | 0.88             | 1.17             | 4.23    | 4.47 | 0.95             | 1.24             |

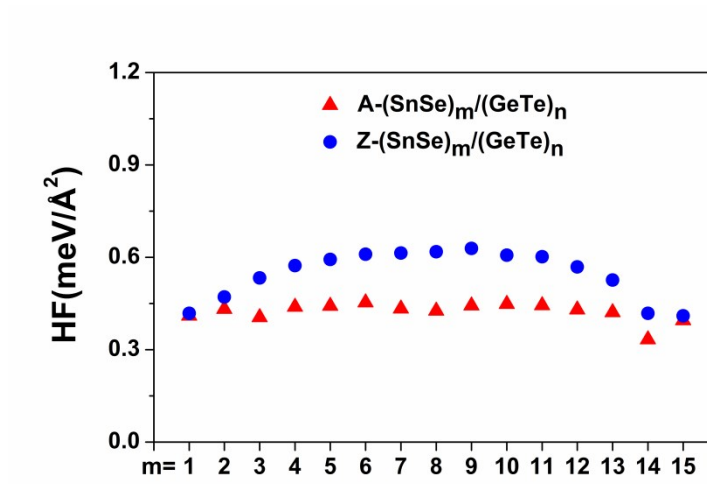

**Fig. S2** Heat of formation (HF) of heterostructures with  $m + n = 16$ . The red triangle represents A-(SnSe)<sub>m</sub>/(GeTe)<sub>n</sub> and blue circle represents Z-(SnSe)<sub>m</sub>/(GeTe)<sub>n</sub>.

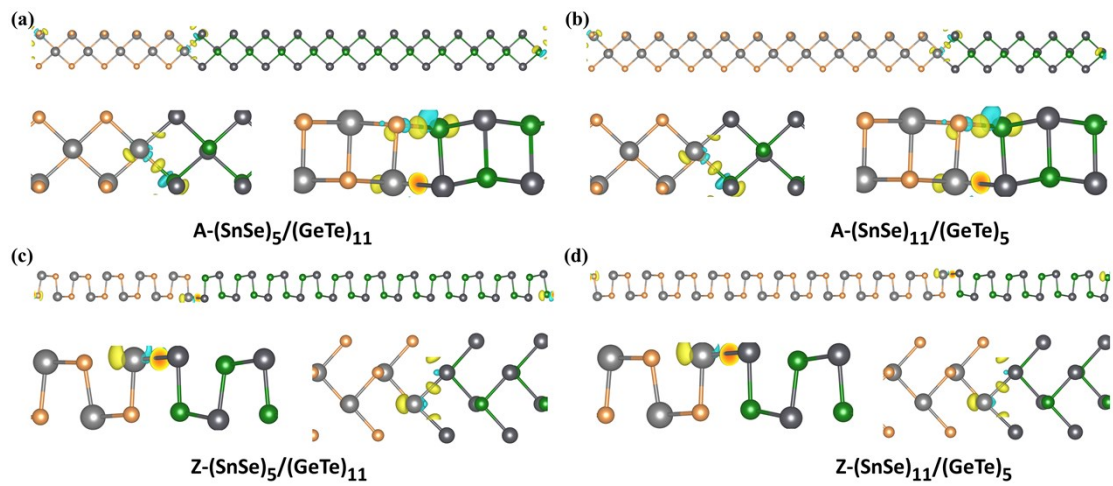

**Fig. S3** The electron density difference of (a) A-(SnSe)<sub>5</sub>/(GeTe)<sub>11</sub>, (b) A-(SnSe)<sub>11</sub>/(GeTe)<sub>5</sub>, (c) Z-(SnSe)<sub>5</sub>/(GeTe)<sub>11</sub> and (d) Z-(SnSe)<sub>11</sub>/(GeTe)<sub>5</sub>. The left and right sides are the side view and top view near the interface, respectively.

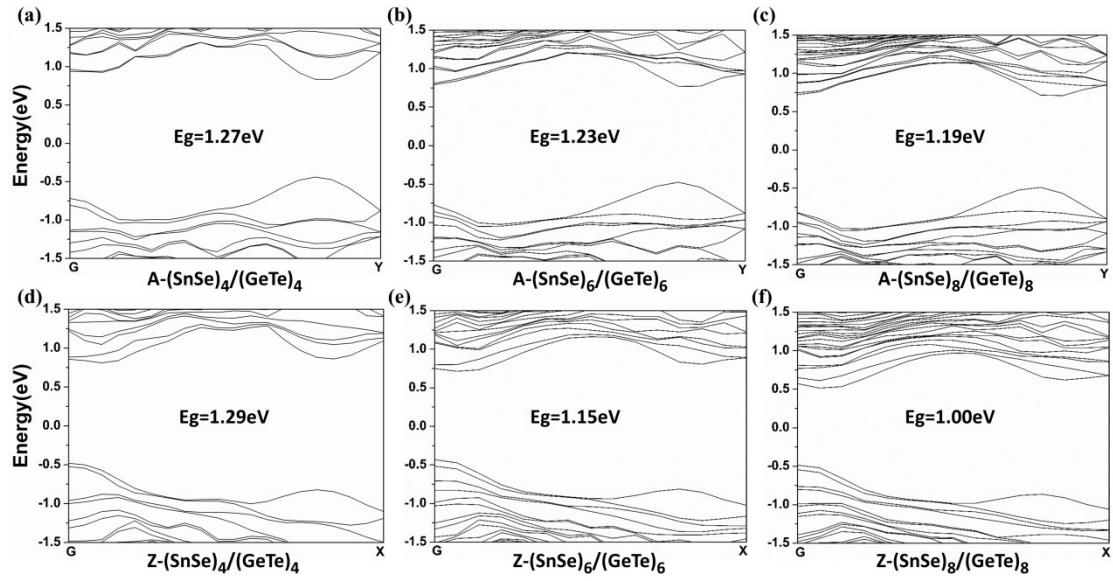

**Fig. S4** Band structures of heterostructures with  $m(n)=4\sim 8$  obtained by HSE06 method.

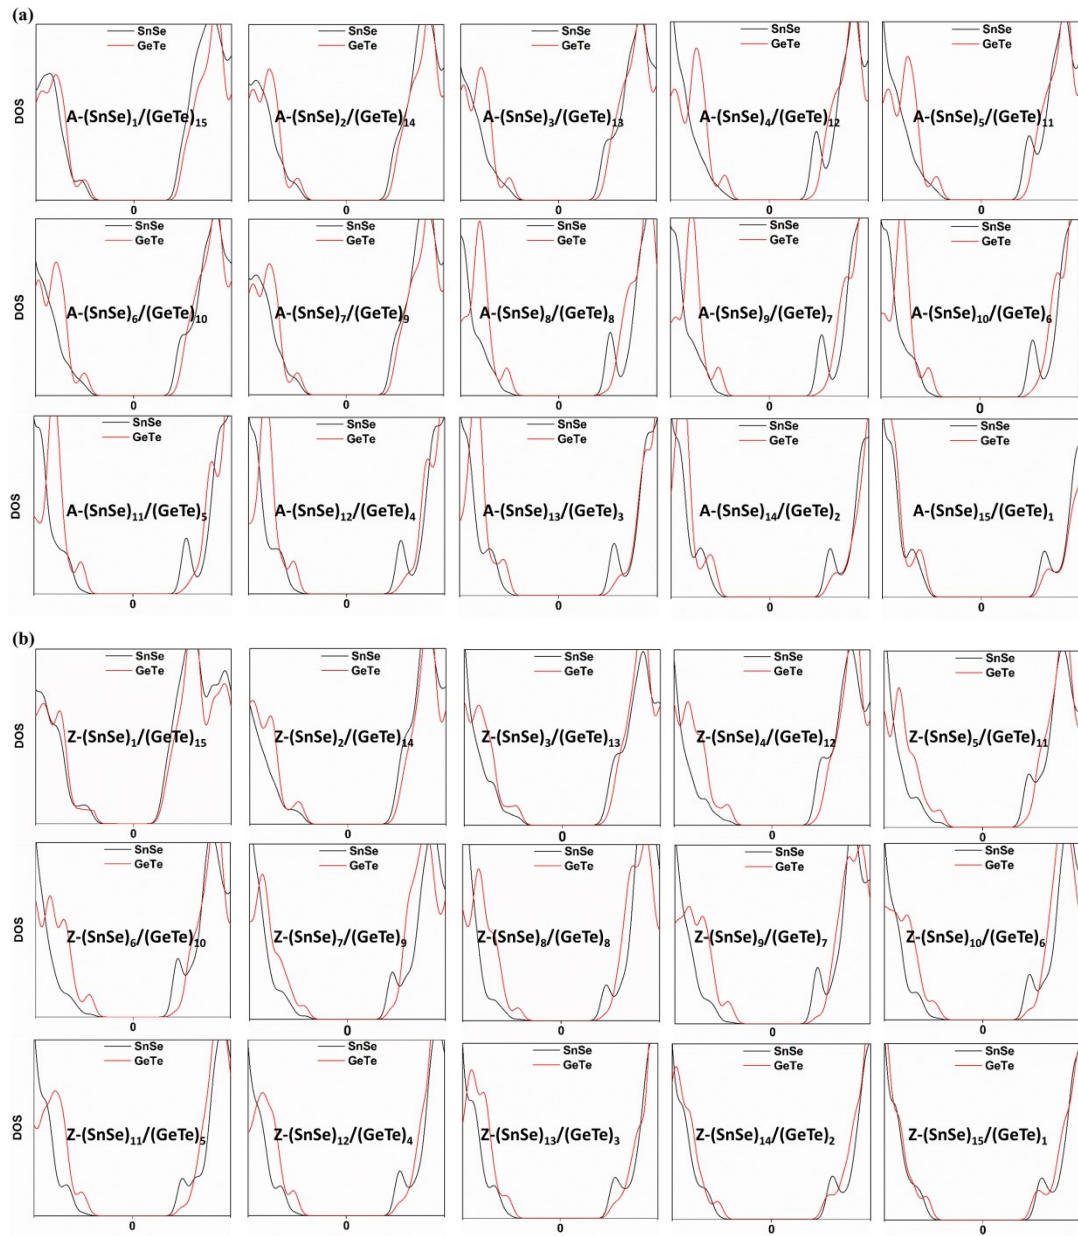

**Fig. S5.** The local density of states in the center of (a) A-(SnSe)<sub>m</sub>/(GeTe)<sub>n</sub> and (b) Z-(SnSe)<sub>m</sub>/(GeTe)<sub>n</sub>.

**Table S2** The  $J_{\text{abs}}$  and PCE values of  $(\text{SnSe})_m/(\text{GeTe})_n$ .

| SnSe/GeTe<br>(m/n) | $J_{\text{abs}}$ (mA/cm <sup>2</sup> ) |        | PCE (%)  |        |
|--------------------|----------------------------------------|--------|----------|--------|
|                    | armchair                               | zigzag | armchair | zigzag |
| 1/15               | 5.12                                   | 4.84   | 21.22    | 21.27  |
| 2/14               | 5.10                                   | 4.75   | 20.58    | 20.53  |
| 3/13               | 5.04                                   | 4.51   | 20.57    | 21.20  |
| 4/12               | 4.97                                   | 4.61   | 20.54    | 20.22  |
| 5/11               | 4.79                                   | 4.54   | 20.56    | 19.41  |
| 6/10               | 4.83                                   | 4.47   | 20.57    | 19.80  |
| 7/9                | 4.63                                   | 4.40   | 20.81    | 19.85  |
| 8/8                | 4.55                                   | 4.19   | 20.85    | 20.14  |
| 9/7                | 4.52                                   | 4.26   | 20.85    | 19.96  |
| 10/6               | 4.46                                   | 4.13   | 21.17    | 20.95  |
| 11/5               | 4.33                                   | 4.04   | 21.17    | 21.30  |
| 12/4               | 4.21                                   | 3.93   | 21.22    | 21.48  |
| 13/3               | 4.10                                   | 3.84   | 21.12    | 21.56  |
| 14/2               | 3.98                                   | 3.54   | 21.38    | type I |
| 15/1               | 3.85                                   | 3.56   | 21.41    | type I |
